# Supplementary material
Source: PubMed Central journal article supplement (PMC7674024)
Supplement: AAC.01013-20-s0001.pdf [file AAC.01013-20-s0001.pdf]

1 **Supplementary methods:**

2 **Reasons for study withdrawal**

3 Three HIV-uninfected women in the q8wk arm who did not deliver were  
4 withdrawn from the study because they could not be located for more than 60 days.

5 One HIV-uninfected woman in the q4wk arm was withdrawn because she moved out of  
6 the study area.

7  
8 **Outliers excluded:**

9 A day 28 trough of 306 ng/mL was excluded given the average trough value for  
10 this patient was 7 ng/mL. The second sample excluded was a 6 hr intensive sample  
11 below the LLOQ for which every other sample in the participant's intensive profile was  
12 above the LLOQ.

13  
14 **BMI as a surrogate marker for malnutrition:**

15 To explore how weight gain could change BMI for a hypothetical malnourished  
16 woman over the second and third trimesters of pregnancy we used weight gain  
17 guidelines from the Institute of Medicine (1). We needed to establish if it is therefore  
18 reasonable to believe the low BMI women in our trial were malnourished at 28 weeks  
19 gestation and to determine what range of continuous BMIs could be expected from a  
20 malnourished woman if she gained the ideal amount of weight (Figure S3)(1). Weight  
21 gain guidelines do not exist for the first trimester so to overcome this knowledge gap  
22 while exploring realistic scenarios we selected a woman from our trial who was enrolled  
23 early in the second trimester (at 14 weeks gestation) with a BMI of 18.3 kg/m<sup>2</sup> as she

24 would be considered malnourished based on pre-pregnancy guidelines (BMI of <18.5  
25 kg/m<sup>2</sup> is considered malnourished). Our derived BMI trajectories, assuming the minimal  
26 (0.45 kg/week) and maximal (0.6 kg/week) recommended weight gain, resulted in a  
27 week 28 BMI of 20.5 and 21.5 kg/m<sup>2</sup>, respectively. The more conservative cutoff of 20.5  
28 kg/m<sup>2</sup> was used when plotting our data but likely underestimates the number of women  
29 malnourished given that recent studies report up to 62% of Ugandan women gain  
30 inadequate weight during pregnancy (2).  
31

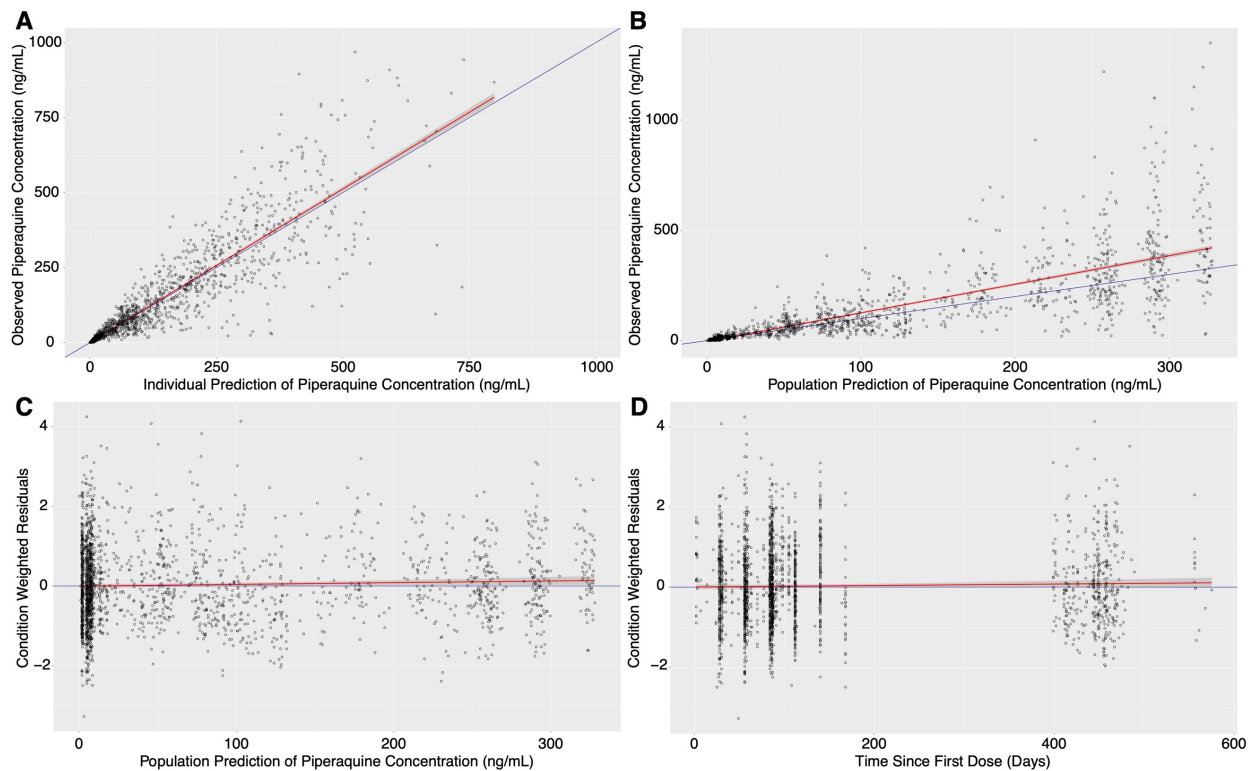

32

33 **Figure S1. Goodness-of-fit plots for the final PQ model. A.** Individual predictions  
 34 versus observations. **B.** Population model predictions versus observations. **C.**  
 35 Population model predictions versus conditional weight residuals **D.** Time after the first  
 36 dose versus conditional weight residuals. Each black circle represents one observation.  
 37 Each black line is the line of unity, and each red regression line is the model based  
 38 locally weighted least-squares.

39

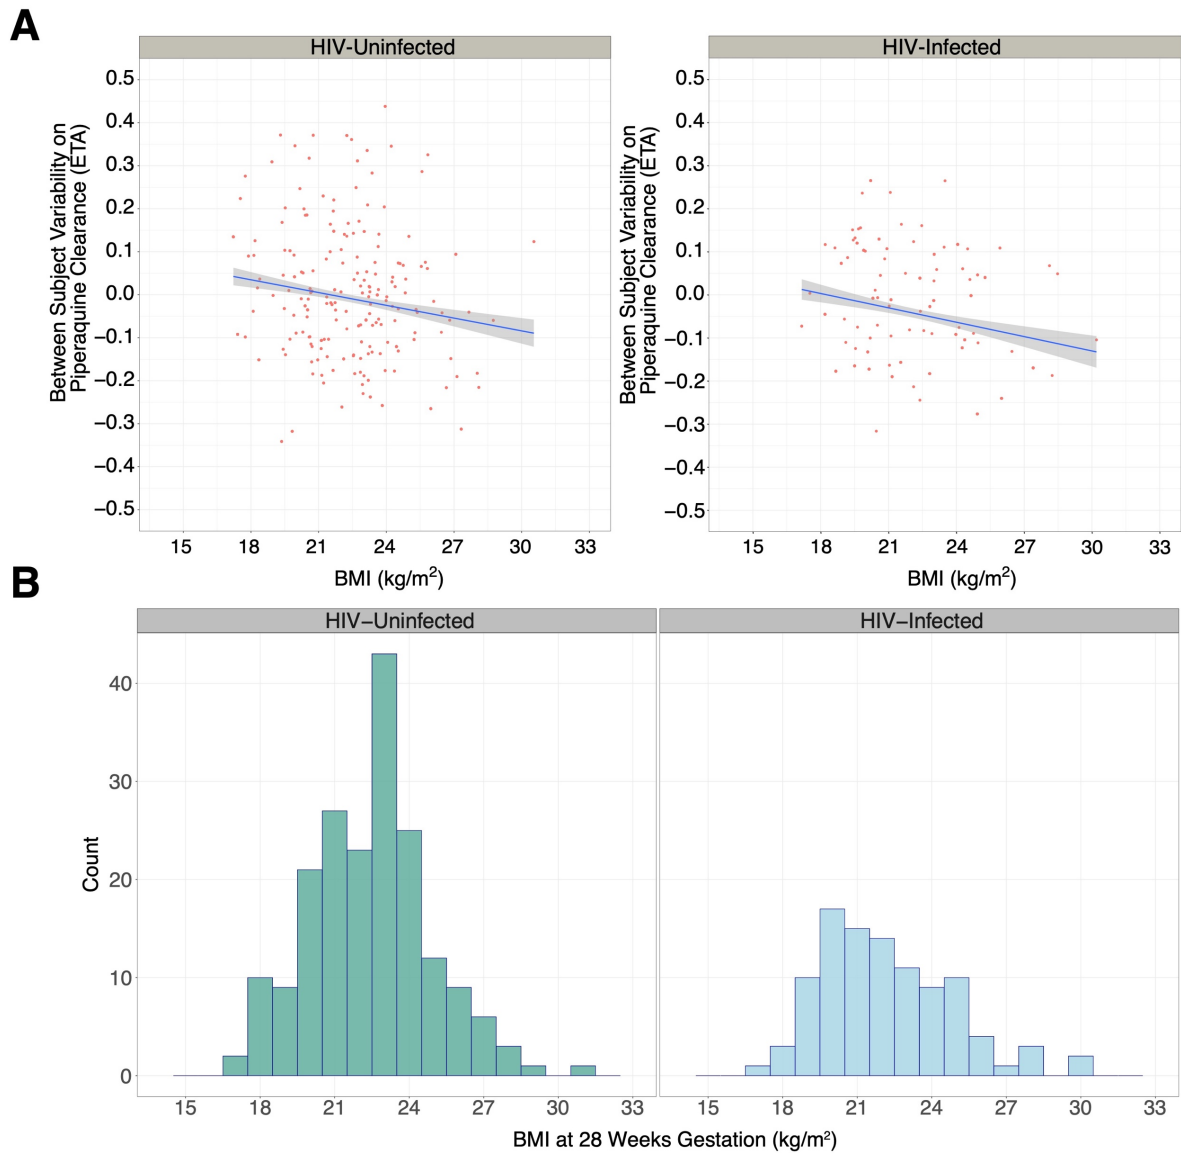

40

41 **Figure S2. BMI at 28 weeks gestation. A.** The linear relationship between PQ  
 42 clearance variability and BMI at 28 weeks gestation stratified based on HIV status. Each  
 43 red circle represents one woman in the study. **B.** The distribution of BMI values at 28  
 44 weeks gestation. The median and interquartile range are 21.5 (19.4 – 22.7) kg/m<sup>2</sup> and  
 45 22.4 (20.1 – 24.1) kg/m<sup>2</sup> for HIV-uninfected and -infected women, respectively.

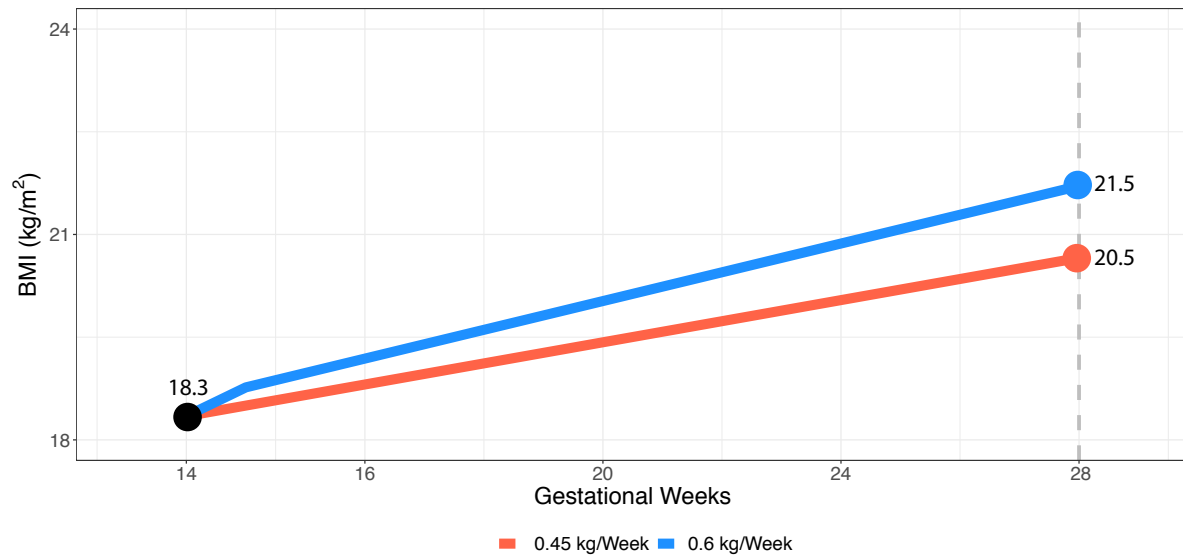

46

47 **Figure S3. Second trimester BMI.** Anticipated changes in BMI over the second  
 48 trimester as a function of recommended weight gain guidelines during the second  
 49 trimester from the Institute of Medicine (1). The minimal (0.45 kg/week) and maximal  
 50 (0.6 kg/week) recommended weight gain are plotted. The week 14 BMI value (18.3  
 51 kg/m<sup>2</sup>) was chosen based on a study participant's value.

52

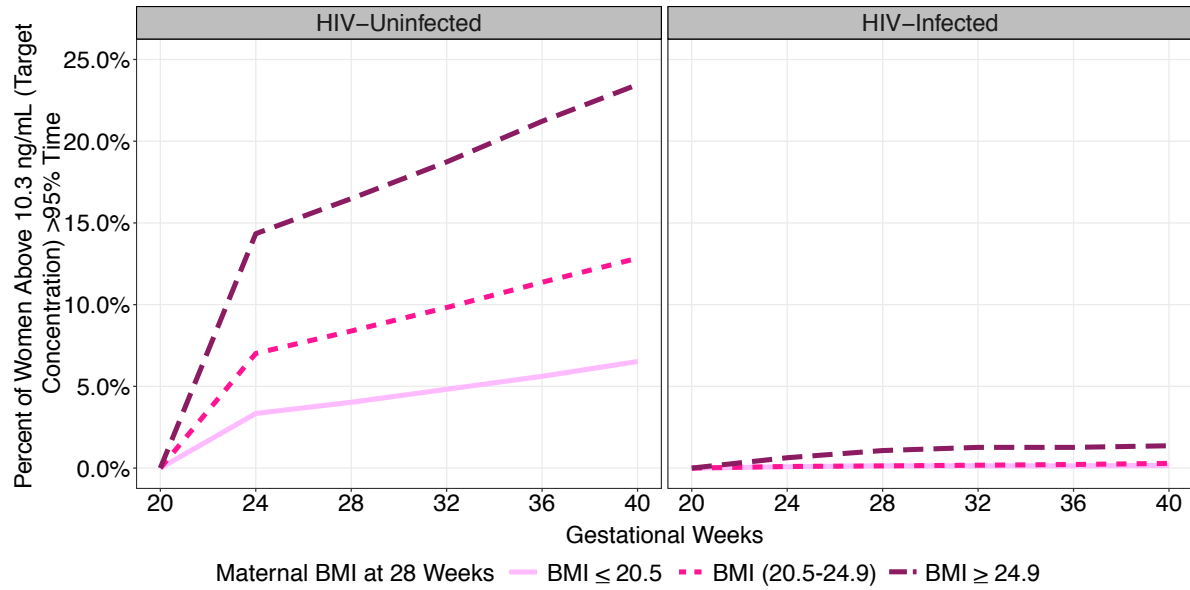

53

54 **Figure S4. Weight based dosing simulations.** Percent of women achieving protection  
 55 based on HIV status for a monthly prevention regimen using weight-based dosing  
 56 guidelines (3). Protection was defined as sustaining a PQ concentration of 10.3 ng/mL  
 57 or greater for 95% of their pregnancy.

58

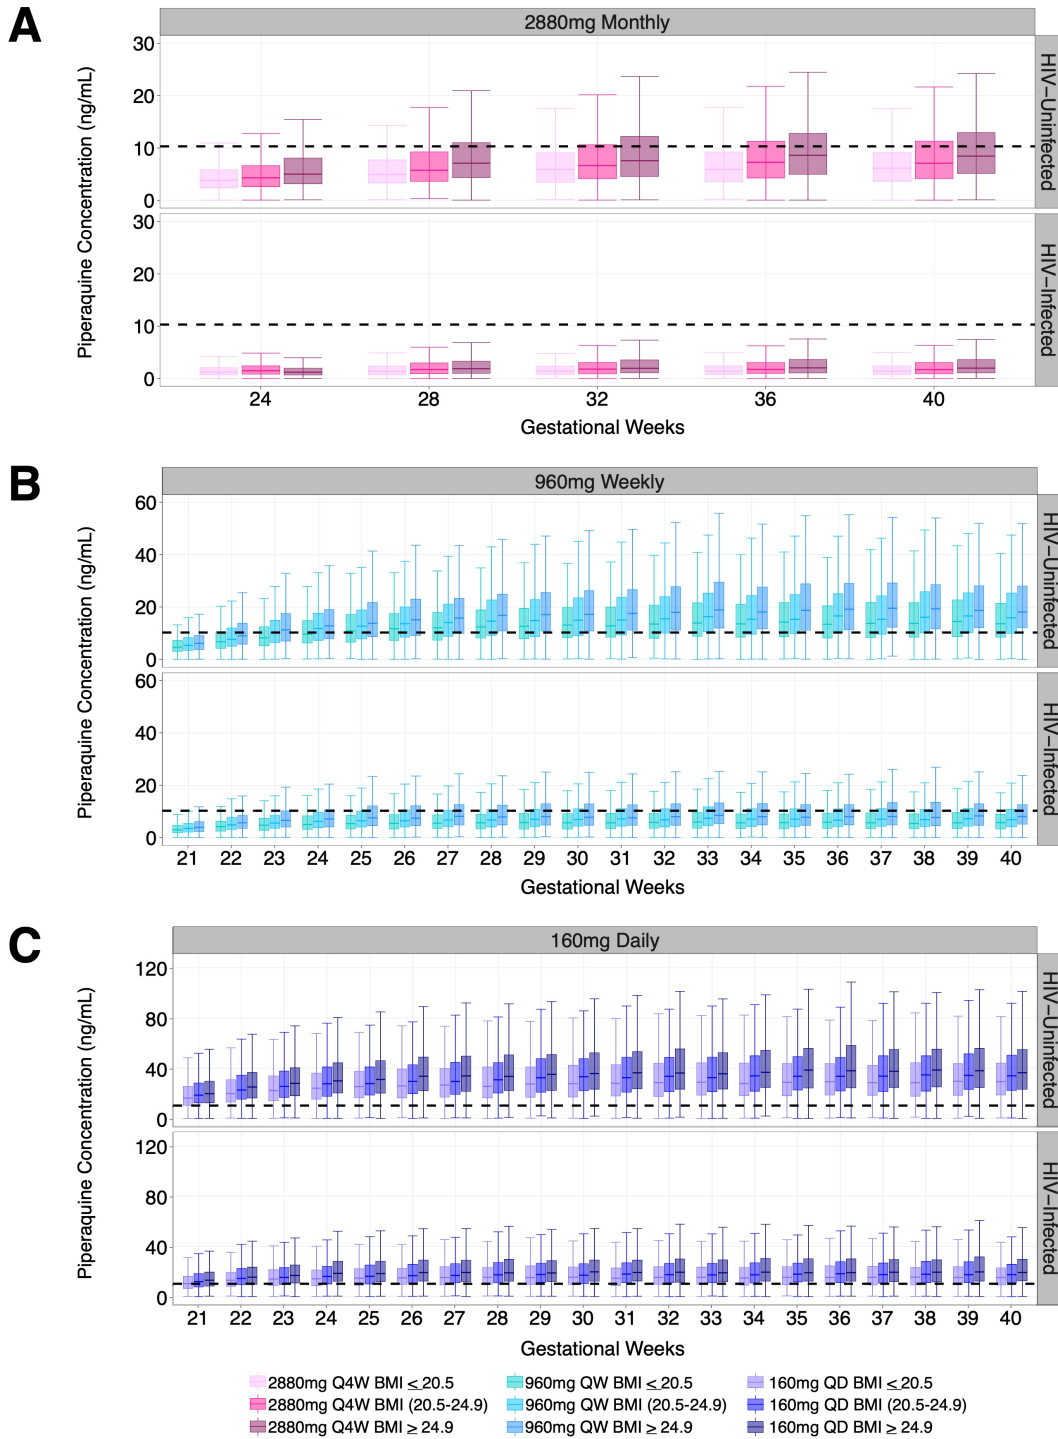

59

60 **Figure S5. Simulated concentrations for alternative IPTp dosing regimens.**

61 Simulated PQ concentrations over pregnancy stratified based on HIV status and week

62 28 BMI. Weekly and daily regimens are displayed with day 7 levels while the monthly

63 regimen is displayed with day 28 levels. The dashed line at 10.3 ng/mL marks the  
64 previously defined threshold for malaria protection in pregnant women (4). Q4W: doses  
65 given every four weeks; QW: doses given every week; QD: doses given daily.

66

67

68

69

70



71 **Table S1.** Maximum concentration and change in QTc interval for simulated dosing  
 72 regimens

| Regimen         | HIV-Uninfected                              |                                    | HIV-Infected                                |                                    |
|-----------------|---------------------------------------------|------------------------------------|---------------------------------------------|------------------------------------|
|                 | Maximum concentration (ng/mL) [median (SD)] | Change in QTc (msec) [median (SD)] | Maximum concentration (ng/mL) [median (SD)] | Change in QTc (msec) [median (SD)] |
| 2880 mg Monthly | 289 ± 126                                   | 14.4 ± 6.31                        | 243 ± 113                                   | 18.7 ± 8.67                        |
| 960 mg Weekly   | 231 ± 107                                   | 11.5 ± 5.35                        | 204 ± 89                                    | 15.7 ± 6.87                        |
| 160 mg Daily    | 71 ± 34                                     | 3.53 ± 1.69                        | 48 ± 25                                     | 3.67 ± 1.91                        |

73

74

75 **Table S2.** Study participant characteristics for intensive PK sampling cohort

| Characteristics                                                                                                                                                                                                                                     | HIV-Uninfected Pregnant          |                                | HIV-Infected Pregnant          |
|-----------------------------------------------------------------------------------------------------------------------------------------------------------------------------------------------------------------------------------------------------|----------------------------------|--------------------------------|--------------------------------|
|                                                                                                                                                                                                                                                     | DHA-PQ every 8 weeks<br>(n = 17) | DHA-PQ every 4 weeks<br>(n=13) | DHA-PQ every 4 weeks<br>(n=28) |
| Age in years, [median (2.5-97.5% percentile)]                                                                                                                                                                                                       | 21 (18-29)                       | 23 (20-30)                     | 30.3 (18.2-40.4)               |
| Gestational age in weeks, no.(%)                                                                                                                                                                                                                    |                                  |                                |                                |
| 16 wk                                                                                                                                                                                                                                               | 15 (88.2)                        | 12 (92.3)                      | 8 (28.6)                       |
| >16 to 20 wk                                                                                                                                                                                                                                        | 2 (11.8)                         | 1 (7.7)                        | 10 (35.7)                      |
| > 20 to 24 wk                                                                                                                                                                                                                                       | 0 (0)                            | 0 (0)                          | 8 (28.6)                       |
| >24 to 28 wk                                                                                                                                                                                                                                        | 0 (0)                            | 0 (0)                          | 2 (7.1)                        |
| Gravidity, no.(%)                                                                                                                                                                                                                                   |                                  |                                |                                |
| 1                                                                                                                                                                                                                                                   | 4 (23.5)                         | 2 (15.4)                       | 5 (17.9)                       |
| 2                                                                                                                                                                                                                                                   | 6 (35.3)                         | 5 (38.5)                       | 3 (10.7)                       |
| ≥ 3                                                                                                                                                                                                                                                 | 7 (41.2)                         | 6 (46.1)                       | 20 (71.4)                      |
| Weight in kg, [median (2.5-97.5% percentile)]                                                                                                                                                                                                       | 58.3 (49.1-76.8)                 | 57.0 (47.3-79.2)               | 57.6 (43.3-71.8)               |
| Height in cm, [median (2.5-97.5% percentile)]                                                                                                                                                                                                       | 162 (152-172)                    | 165 (157-177)                  | 163 (146-174)                  |
| BMI in kg/m <sup>2</sup> , [median (2.5-97.5% percentile)]                                                                                                                                                                                          | 22.3 (19.0-26.4)                 | 21.7 (17.3-25.3)               | 22.0 (18.5-26.4)               |
| Low BMI at enrollment, no.(%)***                                                                                                                                                                                                                    | 1 (5.9)                          | 4 (30.8)                       | 3 (10.7)                       |
| Low BMI at 28 weeks gestation, no.(%)***                                                                                                                                                                                                            | 2 (11.8)                         | 4(30.8)                        | 10 (35.7)                      |
| DP; Dihydroartemisinin-piperaquine;<br>*** Low BMI at enrollment is defined as a BMI of less than 18.5 kg/m <sup>2</sup> . At 28 weeks low BMI is defined as a BMI of 20.5 kg/m <sup>2</sup> or less to account for weight gained during pregnancy. |                                  |                                |                                |

76

77

78

79

80

81

82 **References:**

83

84 1. Rasmussen KM, Yaktine AL (ed). 2009. Weight Gain During Pregnancy: Reexamining the  
85 Guidelines. National Academies Press Washington (DC).

86 2. Wanyama R, Obai G, Odongo P, Kagawa MN, Baingana RK. 2018. Are women in Uganda  
87 gaining adequate gestational weight? A prospective study in low income urban Kampala.  
88 *Reprod Health* 15:160.

89 3. World Health Organization. 2015. Guidelines for the treatment of malaria 3rd ed.  
90 Geneva.

91 4. Savic RM, Jagannathan P, Kajubi R, Huang L, Zhang N, Were M, Kakuru A, Muhindo MK,  
92 Mwebaza N, Wallender E, Clark TD, Opira B, Kanya M, Havlir DV, Rosenthal PJ, Dorsey  
93 G, Aweeka FT. 2018. Intermittent Preventive Treatment for Malaria in Pregnancy:  
94 Optimization of Target Concentrations of Dihydroartemisinin-Piperaquine. *Clin Infect Dis*  
95 67:1079-1088.

96
